# Supplementary material
Source: PubMed Central journal article supplement (PMC3115391)
Supplement: NIHMS290271-supplement-Supp_Figure_S1-S3_Table_S1-S2.pdf [file NIHMS290271-supplement-Supp_Figure_S1-S3_Table_S1-S2.pdf]

## Supporting Information

Table S1. Structural relatives of UTCase

| PDB  | Transcarbamylase | Organism               | Q    | P    | Z    | RMSD | Nalign | Seq-% |
|------|------------------|------------------------|------|------|------|------|--------|-------|
| 3m4j | AOTCase          | <i>X. campestris</i>   | 0.49 | 9.4  | 9.9  | 1.5  | 280    | 27.9  |
| 3gd5 | OTCase           | <i>G. violaceus</i>    | 0.48 | 10.8 | 10.8 | 1.7  | 262    | 26.7  |
| 1fvo | OTCase           | <i>H. sapien</i>       | 0.47 | 10.0 | 10.0 | 1.7  | 276    | 23.9  |
| 1pvv | OTCase           | <i>P. furiosus</i>     | 0.48 | 10.9 | 10.9 | 1.7  | 275    | 25.8  |
| 1vlv | OTCase           | <i>T. maritima</i>     | 0.47 | 10.2 | 10.2 | 1.8  | 274    | 25.9  |
| 2i6u | OTCase           | <i>M. tuberculosis</i> | 0.40 | 9.3  | 9.3  | 1.9  | 256    | 26.2  |
| 2otc | OTCase           | <i>E. coli</i>         | 0.45 | 10.4 | 10.4 | 1.9  | 284    | 21.8  |
| 2w37 | OTCase           | <i>L. hilgardii</i>    | 0.42 | 9.7  | 9.7  | 1.9  | 279    | 21.9  |
| 1dxh | OTCase           | <i>P. pseudomonas</i>  | 0.41 | 8.5  | 9.6  | 2.0  | 273    | 22.7  |
| 2fg6 | SOTCase          | <i>B. fragilis</i>     | 0.39 | 5.4  | 8.2  | 2.0  | 260    | 25.0  |
| 1ml4 | ATCase           | <i>P. abyssi</i>       | 0.42 | 6.2  | 8.9  | 2.0  | 267    | 19.5  |
| 3d6n | ATCase           | <i>A. aeolicus</i>     | 0.35 | 5.5  | 8.9  | 2.0  | 239    | 18.0  |
| 8at1 | ATCase           | <i>E. coli</i>         | 0.37 | 4.9  | 8.6  | 2.1  | 257    | 19.1  |

Table S2. The *ygeW* and *ygeA* gene and their genomic locations

| Organism                                         | Protein ID   | Locus-tag        |                  |
|--------------------------------------------------|--------------|------------------|------------------|
|                                                  |              | <i>ygeW</i>      | <i>ygeA</i>      |
| Aeromonas hydrophila subsp. hydrophila ATCC 7966 | YP_856685    | AHA_2161         | AHA_2165         |
| Anaerotruncus colihominis DSM 17241              | ZP_02440823  | ANACOL_00087     | ANACOL_00088     |
| Anaerococcus prevotii DSM 20548                  | YP_003153177 | Apre_1433        | Apre_1429        |
| Anaerococcus tetradius ATCC 35098                | ZP_03931338  | HMPREF0077_1973  | HMPREF0077_1975  |
| Anaerococcus vaginalis ATCC 51170                | ZP_05473079  | HMPREF0078_1336  | HMPREF0078_1126  |
| Anaerostipes caccae DSM 14662                    | ZP_02421132  | ANACAC_03786     | ANACAC_03787     |
| Atopobium parvulum DSM 20469                     | YP_003179264 | Apar_0241        | Apar_0242        |
| Atopobium rimae ATCC 49626                       | ZP_03568816  | ATORI0001_0046   | ATORI0001_1154   |
| Bacteroides capillosus ATCC 29799                | ZP_02035761  | BACCAP_01358     | BACCAP_01360     |
| Brachyspira hyodysenteriae WA1                   | YP_002720240 | BHWA1_00064      | BHWA1_00063      |
| Brachyspira murdochii DSM 12563                  | YP_003634918 | Bmur_2651        | Bmur_2650        |
| Brachyspira pilosicoli 95/1000                   | YP_003785222 | BP951000_0722    | BP951000_0721    |
| Citrobacter rodentium ICC168                     | YP_003366866 | ROD_34031        | ROD_33991        |
| Clostridium beijerinckii NCIMB 8052              | YP_001309094 | Cbei_1968        | Cbei_1969        |
| Clostridium bolteae ATCC BAA-613                 | ZP_02085552  | CLOBOL_03090     | CLOBOL_03091     |
| Clostridium botulinum B str. Eklund 17B          | YP_002805407 | CLL_A0623        | CLL_A0624        |
| Clostridium carboxidivorans P7                   | ZP_05392115  | CcarbDRAFT_2115  | CcarbDRAFT_2119  |
| Clostridium hathewayi DSM 13479                  | ZP_06117625  | CLOSTHATH_06075  | CLOSTHATH_06073  |
| Clostridium hylemonae DSM 15053                  | ZP_03777517  | CLOHYLEM_04569   | CLOHYLEM_04568   |
| Clostridium ljungdahlii DSM 13528                | YP_003780544 | CLJU_c23840      | CLJU_c23800      |
| Clostridium saccharolyticum WM1                  | YP_003821271 | Closa_1031       | Closa_1030       |
| Clostridium scindens ATCC 35704                  | YP_02432639  | CLOSCI_02886     | CLOSCI_02887     |
| Clostridium sp. 7_2_43FAA                        | ZP_05130377  | CSBG_00897       | CSBG_00898       |
| Clostridium sporogenes ATCC 15579                | ZP_02995005  | CLOSP0_02127     | CLOSP0_02414     |
| Clostridiales bacterium 1_7_47FAA                | ZP_04670451  | CBFG_01142       | CBFG_04886       |
| Collinsella aerofaciens ATCC 25986               | ZP_01772316  | COLAER_01320     | COLAER_01230     |
| Edwardsiella ictaluri 93-146                     | YP_002934904 | NT01EI_3533      | NT01EI_3529      |
| Edwardsiella tarda EIB202                        | YP_003297220 | ETA_E_3178       | ETA_E_3174       |
| Enterobacter cloacae SCF1                        | YP_003942316 | Entcl_2784       | Entcl_2788       |
| Enterococcus faecalis ATCC 29200                 | ZP_04438022  | HMPREF0345_1509  | HMPREF0345_1510  |
| Escherichia coli CFT073                          | NP_755323    | C3448            | C3452            |
| Eubacterium limosum KIST612                      | YP_003960387 | ELI_2442         | ELI_2441         |
| Eubacterium hallii DSM 3353                      | ZP_03716602  | EUBHAL_01666     | EUBHAL_01667     |
| Eubacterium yurii subsp. margaretae ATCC 43715   | ZP_07453580  | HMPREF0379_0273  | HMPREF0379_0275  |
| Leptotrichia goodfellowii F0264                  | ZP_06011127  | HMPREF0554_0912  | HMPREF0554_0987  |
| Oribacterium sinus F0268                         | ZP_03990290  | HMPREF6123_0229  | HMPREF6123_0228  |
| Oribacterium sp. oral taxon 078 str. F0262       | YP_06599918  | GCWU000341_02703 | GCWU000341_02702 |
| Photobacterium profundum SS9                     | YP_130199    | PBPRA1994        | PBPRA1990        |
| Ruminococcus gnavus ATCC 29149                   | ZP_02041390  | RUMGNA_02158     | RUMGNA_02156     |
| Ruminococcus sp. 5_1_39BFAA                      | ZP_04855232  | RSAG_00193       | RSAG_00194       |
| Ruminococcus obeum ATCC 29174                    | ZP_01965028  | RUMOBE_02759     | RUMOBE_02758     |
| Sebaldella termitidis ATCC 33386                 | YP_003308453 | Sterm_1664       | Sterm_1665       |
| Shewanella benthica KT99                         | ZP_02156908  | KT99_16614       | KT99_16594       |
| Shewanella halifaxensis HAW-EB4                  | YP_001672869 | Shal_0635        | Shal_0639        |
| Shigella sonnei Ss046                            | YP_311848    | SSON_3021        | SSON_3025        |
| Spirochaeta smaragdinae DSM 11293                | YP_003803116 | Spirs_1395       | Spirs_1022       |
| Spirochaeta smaragdinae DSM 11293                | YP_003801863 | Spirs_0111       | Spirs_1022       |
| Treponema vincentii ATCC 35580                   | ZP_05621704  | TREVI0001_1578   | TREVI0001_0380   |
| Trichomonas vaginalis G3                         | XP_001326968 | TVAG_038530      | TVAG_261970      |
| Veillonella dispar ATCC 17748                    | ZP_04599321  | VEIDISOL_00755   | VEIDISOL_00756   |
| Veillonella parvula DSM 2008                     | YP_003312230 | Vpar_1270        | Vpar_1269        |
| Vibrio shilonii AK1                              | ZP_01868986  | VSAK1_15732      | VSAK1_15712      |
| Veillonella sp. oral taxon 158 str. F0412        | ZP_07826449  | HMPREF9199_1314  | HMPREF9199_1313  |

The species with *ygeW* gene without *ygeA* gene around are highlighted in grey.

**Figure S1.** Schematic representation of the ureido degradation pathway.

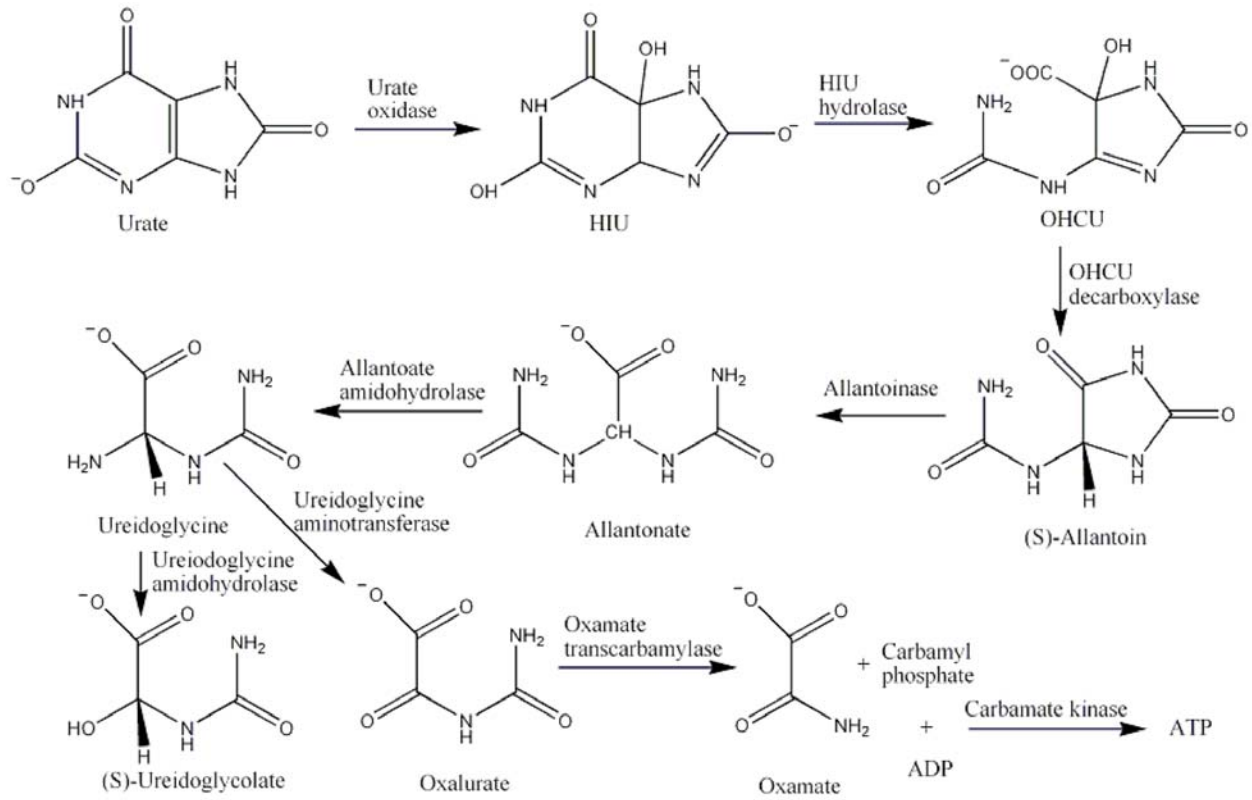

**Figure S2.** Sequence alignment of *Escherichia coli* UTCase with *Xanthomonas campestris* AOTCase, *Escherichia coli* OTCase *Bacteroides fragilis* SOTCase and *E. coli* ATCase. The secondary structural elements are indicated by boxes in yellow-green ( $\beta$ -strand) and red ( $\alpha$ -helix) above the sequence. Loops discussed in the paper are boxed. Residues that are conserved across UTCase, AOTCase and OTCase, and probably involved in binding substrates are colored in blue. Residues that are not conserved and probably involved in binding substrates are colored red.

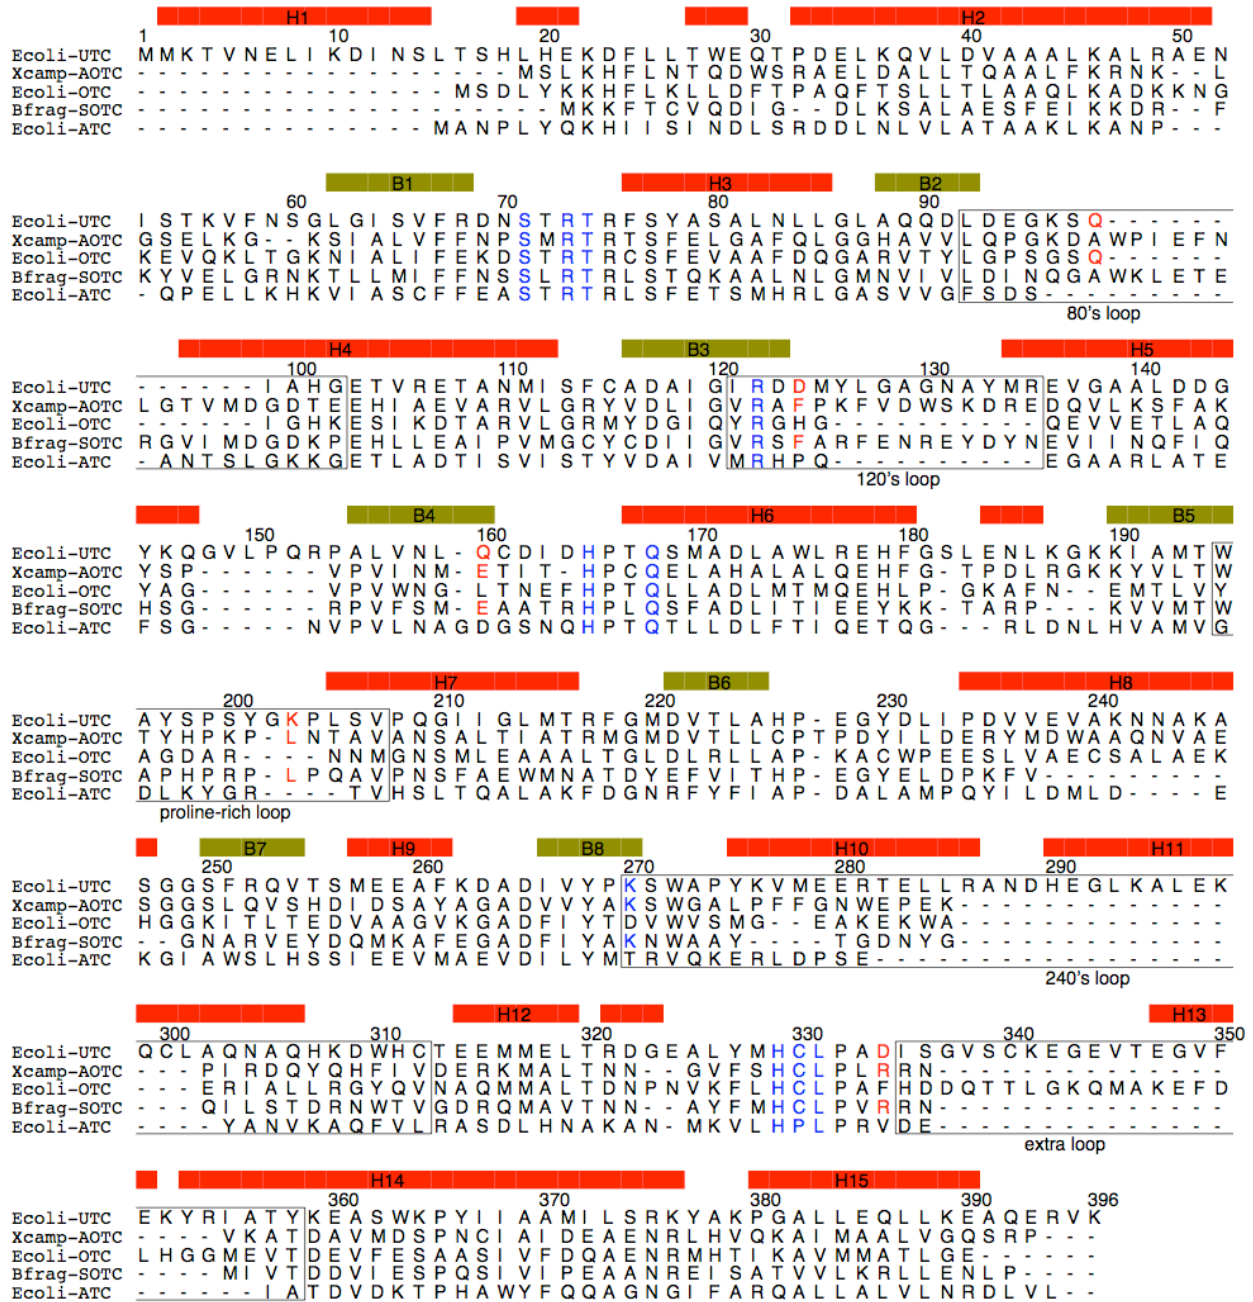

**Figure S3.** The sequence alignment for all available *ygeW* encoded protein sequences using program ClusterW.

```

Ahydr-UTC/1-395 ~~~~~~ MKA VNQLIKEINE LKS..NLHEK DFLLTWEQTP
Acoli-UTC/1-398 ~~~~~~ MDQK LQAYIDKLNK LNFK.GMYEN DFFLTWEKTN
Aprev-UTC/1-398 ~~~~~~ MTAD IKKLIDELSE LDYE.NLFED DFFHTWDKSQ
Atetr-UTC/1-398 ~~~~~~ MTQD IKKLIDELQE LDHE.KLFGN DFFHTWDKSQ
Avagi-UTC/1-404 ~~~~~~ MTQD INKLLKLEK LDFE.NLYHD DFFHTWDKSQ
Acacc-UTC/1-399 ~~~~~~ MKMNT LQDYIDRLNQ LNFK.EMYQN DFFLTWEKTD
Aparv-UTC/1-400 ~~~~~~ MATT IQPYLDKLAK LDFS.KMYNE DFLLTWEKST
Arima-UTC/1-400 ~~~~~~ MADT IQPYLDELAK LDFS.KMYNE DFLLTWEKST
Bcapi-UTC/1-399 ~~~~~~ MDAK LQAYIDKLNA LNFK.EMYEG DFFLTWEKTD
Bhyod-UTC/1-379 ~~~~~~ ~~~~~~ ~~~~~~ ~~~~~~ MYQN DFFLTWDKTF
Bmurd-UTC/1-397 ~~~~~~ MS IQKYISKLDS LEFG.KMYKN DFFLTWDKTF
Bpilo-UTC/1-380 ~~~~~~ ~~~~~~ ~~~~~~ ~~~~~~ MYKN DFFLTWDKTF
Crode-UTC/1-395 ~~~~~~ MKT VNELIKDLNK LNS..HLSEK DFLLTWEQSP
Cbeij-UTC/1-397 ~~~~~~ MSI VDKYVNALKS LEID.QMYKN DFLLTWEKTT
Cbolt-UTC/1-398 ~~~~~~ IMKT LQDYIDKLNS LNFK.EMYEN DFFLTWEKTD
Cbotu-UTC/1-398 ~~~~~~ MQD IKKLIEELKN IEFK.KMYNN DFFLTWEKTD
Ccarb-UTC/1-398 ~~~~~~ MEK LKELIQNLKK LDYK.NMYNN DFFLTWEKTD
Chath-UTC/1-397 ~~~~~~ MKT LQDYIDKLNA LNFK.EMYNN DFFLTWEKTD
Chyle-UTC/1-398 ~~~~~~ MMKT LQDYIDKLNS LNFK.EMYNG DFFLTWEKTD
Cljun-UTC/1-398 ~~~~~~ MEK LKELIQNLKK LDYK.NMYSN DFFLTWEKTD
Csacc-UTC/1-397 ~~~~~~ MKT LQDYIDKLNS LNFK.EMYEN DFFLTWEKSD
Cscin-UTC/1-397 ~~~~~~ MKT LQDYLDKLN LNFK.EMYNG NFFLTWEKTD
Csp72-UTC/1-397 ~~~~~~ MAL MDKYINELNQ LDFS.KMHND DFMETWKKSD
Cspor-UTC/1-398 ~~~~~~ MQE IKKLTEKLES LKYD.KMYNN DFFLTWEKTD
Cbact-UTC/1-397 ~~~~~~ MKT LQDYIDKLNS LNFK.EMYEN DFFLTWEKTD
Caero-UTC/1-400 ~~~~~~ MDAK FTELVEQLNG LDFK.GMYGS DFLHTWDKTT
Eicta-UTC/1-395 ~~~~~~ MKT VNEI IKDINA LKS..NLHDK DFLLTWEQSP
Etard-UTC/1-395 ~~~~~~ MKT VNEI IKDINA LKS..NLHDK DFLLTWEQSP
Ecloa-UTC/1-395 ~~~~~~ MKT VNELIKDINT LTS..HLHEK DFLLTWEQTP
Efaec-UTC/1-397 ~~~~~~ MET FKEYIEKLDK LEFE.KMYEN DFFLTWEKTR
Ecoli-UTC/1-396 ~~~~~~ MMKT VNELIKDINS LTS..HLHEK DFLLTWEQTP
Elimo-UTC/1-399 ~~~~~~ MDKT LQTYIDKLNA LNFK.EMYEN DFFLTWEKTP
Ehall-UTC/1-399 ~~~~~~ MDKK LQGYIDKLNK LNFK.EMYNG DFFLTWEKTD
Eyuri-UTC/1-397 ~~~~~~ MSL MQKYIGKLD LNFE.KMYNN DFFETWTKTF
Lgood-UTC/1-397 ~~~~~~ MVN IKKYIKILEK LNFK.SMYNS DFFLTWEKTG
Osinu-UTC/1-415 MGLYRINTFL KEIKMDKKQQ FEELVKEIKG LKTD.KMYLN DFFLTWEKSD
Ospor-UTC/1-401 ~~~~~~ MDKQKN FDALLKAIAG RKTE.KMYQN DFFLTWEKTE
Pprof-UTC/1-395 ~~~~~~ MKS INELIKEINE LKS..ELHEK DFLLTWEQSP
Rganv-UTC/1-397 ~~~~~~ MKT LQDYIDKLNA LNFK.DMYNS DFFLTWEKTD
Rsp51-UTC/1-397 ~~~~~~ MKT LQDYIDKLNS LNFK.EMYNN DFFWTWDKTD
Robeu-UTC/1-397 ~~~~~~ MKT LQDYIDKLNK LNFK.EMYNN DFFWTWDKTD
Sterm-UTC/1-401 ~~~~~~ MDKMQ FEEIARLEK LDYK.DMLND DFFLTWDKST
Sbent-UTC/1-396 ~~~~~~ MMKS INTLIKDINE LES..QLDQK DFLLTWEQTP
Shali-UTC/1-395 ~~~~~~ MKS INSLIKEINE LES..QLDQK DFLLTWEQTP
Ssonn-UTC/1-372 ~~~~~~ ~~~~~~ ~~~~~~ ~~~~~~ ~~~~~~ MLTWEQTP
Ssma1-UTC/1-398 ~~~~~~ MDKIG IEEMIRSLST LRTE.KMYLK DFFHTWKHSD
Ssma2-UTC/1-398 ~~~~~~ MDRIG IKEKIKLSLR LRTE.DMYLN DFFHTWKKSD
Tvinc-UTC/1-400 ~~~~~~ IMALI MDPYITKLN LSFK.KMYNN DFFLTWEKTF
Tvagi-UTC/1-398 ~~~~~~ MSA LDGYVQELEK LDGKICTYGK DWLRTWDMND
Vdisp-UTC/1-397 ~~~~~~ MTD FNKSIETLKG LDVS.KMYGE DFFLTWEKSE
Vparv-UTC/1-397 ~~~~~~ MTD FNKSIETLQK LDVS.KMYGE DFFLTWEKSD
Vshil-UTC/1-395 ~~~~~~ MKN MNELIKEISQ LES..KLHDK DFLLTWEQSP
Vspor-UTC/1-397 ~~~~~~ MTD FNKSIETLQN LDVS.KMYGE DFFLTWEKSD

```

|                 |            |             |             |            |             |
|-----------------|------------|-------------|-------------|------------|-------------|
| Ahydr-UTC/1-395 | QELALVLKLA | EALKGLRAEN  | IATKLFNTGL  | GISVFRDNST | RTRFSYASAL  |
| Acoli-UTC/1-398 | DELEAVFTVA | DALRYMREQN  | ISTKIFESGL  | GISLFRDNST | RTRFSFASAC  |
| Aprev-UTC/1-398 | DELKAIWKTA | DIIRAMREEN  | ISPKIFDSGL  | GISLFRDNST | RTRFSFASAC  |
| Atetr-UTC/1-398 | DELKAIWKTA | DILRAMREEN  | ISPKIFDSGL  | GISLFRDNST | RTRFSFASAC  |
| Avagi-UTC/1-404 | DELEAIFTVA | DTLRAMREKN  | ISPKIFDSGL  | AISLFRDNST | RTRFSYASAA  |
| Acacc-UTC/1-399 | DELEAVWLVA | DALRFMRENN  | ISTKVFESGL  | GISLFRDNST | RTRFSFASAC  |
| Aparv-UTC/1-400 | DELQALYAVA | DALRNLRERN  | ISTRLEFESGL | AVSLFRDNST | RTRFSFASGS  |
| Arima-UTC/1-400 | DELRALYAVA | DALRNLRERN  | ISTRLEFESGL | AVSLFRDNST | RTRFSYASGS  |
| Bcapi-UTC/1-399 | DELEAVFTVA | DALRYMRENN  | ISTKIFESGL  | GISLFRDNST | RTRFSFASAC  |
| Bhyod-UTC/1-379 | DELQAVWTVA | DALRFLRESN  | ISTKVFDSGL  | GISLFRDNST | RTRFSFASAC  |
| Bmurd-UTC/1-397 | DELQAVWTVA | DALRFLRESN  | ISTKVFDSGL  | GISLFRDNST | RTRFSFASAC  |
| Bpilo-UTC/1-380 | DELQAVWTVA | DALRFLRESN  | ISTKVFDSGL  | GISLFRDNST | RTRFSFASAC  |
| Crode-UTC/1-395 | DELKQVLDVA | ATLKTLLRAEN | IATKVFNSGL  | GISIFRDNST | RTRFSYASAL  |
| Cbeij-UTC/1-397 | DELKAVYEVA | DALRELRRNN  | KSTRLEFDSGL | GISLFRDNST | RTRFSYASAC  |
| Cbolt-UTC/1-398 | EELEAVWTVA | DALRFMRENN  | ISTKVFESGL  | GISLFRDNST | RTRFSFASAC  |
| Cbotu-UTC/1-398 | DELKAVFTVA | DILRKMRENN  | ISTKIFDSGL  | GISVFRDNST | RTRFSFASAC  |
| Ccarb-UTC/1-398 | EELKAVFTVA | DILREMRENN  | ISPRIFDSGL  | AISLFRDNST | RTRFSFASAC  |
| Chath-UTC/1-397 | EELEAVWTVA | DALRFMRENN  | ISTKVFESGL  | GISLFRDNST | RTRFSFASAC  |
| Chyle-UTC/1-398 | DELEAVFTLA | DALRFMREHN  | ISTKVFESGL  | GISLFRDNST | RTRFSFASAC  |
| Cljun-UTC/1-398 | EELKAVFTVA | DILRQMRENN  | ISPRIFDSGL  | AISLFRDNST | RTRFSFASAC  |
| Csacc-UTC/1-397 | AELEAVWTVA | DALRFMRENN  | ISTKVFESGL  | GISLFRDNST | RTRFSFASAC  |
| Cscin-UTC/1-397 | DEIEAVFTLA | DALRYMRENN  | ISTKVFESGL  | GISLFRDNST | RTRFSFASAC  |
| Csp72-UTC/1-397 | DELKAVFTVA | EALRDLRKNN  | ISTKIFDSGL  | GISLFRDNST | RTRFSFASAC  |
| Cspor-UTC/1-398 | DELKAVFQVA | DILRKMRENN  | ISTKIFDSGL  | GISVFRDNST | RTRFSFASAC  |
| Cbact-UTC/1-397 | EELEAVWTVA | DALRYMRENN  | ISTKVFESGL  | GISLFRDNST | RTRFSFASAC  |
| Caero-UTC/1-400 | DELKALYIVA | DALRELRENN  | VSSKIFDSGL  | AVSLFRDNST | RTRFSFASKAA |
| Eicta-UTC/1-395 | EELKLVLDVA | EALKTMRAEN  | ITTKIFNSGL  | GISVFRDNST | RTRFSYASAL  |
| Etard-UTC/1-395 | EELKLVLDVA | EALKTMRAEN  | IATKIFNSGL  | GISVFRDNST | RTRFSYASAL  |
| Ecloa-UTC/1-395 | DELKQVLDIA | AALKTLRAEN  | IATKVFNSGL  | GISVFRDNST | RTRFSYASAL  |
| Efaec-UTC/1-397 | DELEAVFTVA | DTLRYLRENN  | ISTKIFDSGL  | GISLFRDNST | RTRFSFASAC  |
| Ecoli-UTC/1-396 | DELKQVLDVA | AALKALRAEN  | ISTKVFNSGL  | GISVFRDNST | RTRFSYASAL  |
| Elimo-UTC/1-399 | EELEAVFTVA | DALRYMRENN  | ISTKIFESGL  | GISLFRDNST | RTRFSFASAC  |
| Ehall-UTC/1-399 | DELEAVFTVA | EALRYMRENN  | ISTKVFESGL  | GISLFRDNST | RTRFSFASAC  |
| Eyuri-UTC/1-397 | DELQATWTV  | DALRKLREEN  | ISTKIFDSGL  | GISLFRDNST | RTRFSFASAC  |
| Igood-UTC/1-397 | DELDAVFIVA | DALRYLRENN  | ISSKIFDSGL  | GISLFRDNST | RTRFSFASAC  |
| Osinu-UTC/1-415 | DELKAVWDVA | DALRNLRERN  | ISTKVFDSGL  | GISLFRDNST | RTRFSFASAC  |
| Ospor-UTC/1-401 | DELKAVWEVA | DALRNLRERN  | ISTRVFDSDGL | GISLFRDNST | RTRFSFASAC  |
| Pprof-UTC/1-395 | EELERVLKTA | QVLKAMRQEN  | IATNVFNNGL  | GISLFRDNST | RTRFSYASAI  |
| Rganv-UTC/1-397 | DELEAVFTLA | DALRFMRENN  | ISTKVFESGL  | GISLFRDNST | RTRFSFASAC  |
| Rsp51-UTC/1-397 | DELEAVFTVA | DALRFMRENN  | ISTKVFESGL  | GISIFRDNST | RTRFSFASAC  |
| Robeu-UTC/1-397 | EELEAVFTVA | DALRFMRENN  | ISTKVFESGL  | GISIFRDNST | RTRFSFASAC  |
| Sterm-UTC/1-401 | DELNSVFAVA | DALRNLREQN  | ISTKVFDSGL  | GISLFRDNST | RTRFSFASAC  |
| Sbent-UTC/1-396 | AELERVLKTA | KVLKTMRDEN  | IATNVFNNGL  | GISLFRDNST | RTRFSYASAI  |
| Shali-UTC/1-395 | AELERVLKTA | KVLKTMRAEN  | IATNVFNNGL  | GISLFRDNST | RTRFSYASAI  |
| Ssonn-UTC/1-372 | DELKQVLDVA | AALKALRAEN  | ISTKVFNSGL  | GISVFRDNST | RTRFSYASAL  |
| Ssma1-UTC/1-398 | DEIRATFEVA | EILRGMRENN  | ISSRVFDSGL  | AISLFRDNST | RTRFSFASAC  |
| Ssma2-UTC/1-398 | QEIKAVFEVA | DILRGMRNNN  | ISTRLEFDSGL | GISLFRDNST | RTRFSYASAC  |
| Tvinc-UTC/1-400 | DEILATWTV  | DALRTLREAN  | ISTKIFESGL  | GISLFRDNST | RTRFSFASAC  |
| Tvagi-UTC/1-398 | ETIRSTLNCS | WALEELIKNN  | VSKKIFKSGL  | GASIFRDNST | RTRFSFASAT  |
| Vdisp-UTC/1-397 | DELKGVWAVA | DALRALRERN  | ISTKVFDSGL  | GISLFRDNST | RTRFSFASAC  |
| Vparv-UTC/1-397 | DELQGVWAVA | DALRALRERN  | ISTKVFDSGL  | GISLFRDNST | RTRFSFASAC  |
| Vshil-UTC/1-395 | EELERVLKTA | QVLKTMRGEN  | IATNVFKNGL  | GISLFRDNST | RTRFSYASAI  |
| Vspor-UTC/1-397 | DELQGVWAVA | DALRALRERN  | ISTKVFDSGL  | GISLFRDNST | RTRFSFASAC  |

|                 |            |            |            |            |            |
|-----------------|------------|------------|------------|------------|------------|
| Ahydr-UTC/1-395 | NLLGLTQODL | DEGKSQIAHG | ETVRETANMI | SFCADAIGIR | DDMYLGAGNA |
| Acoli-UTC/1-398 | NMLGLEVQDL | DEGKSQVAHG | ETVRETANMI | SFMADVIGIR | DDMYIGKGN  |
| Aprev-UTC/1-398 | NLLGLEVQDL | DESKSQIAHG | ETVKETANMI | SFMADVVGIR | DDMYIGKGYK |
| Atetr-UTC/1-398 | NLLGLEVQDL | DEGKSQIAHG | ETVKETANMI | SFMADVVGIR | DDMYIGKGYK |

|                 |            |            |            |            |            |
|-----------------|------------|------------|------------|------------|------------|
| Avagi-UTC/1-404 | NMLGLEVQDL | DEGKSQQAHG | ETVKETANMI | SFMADTVGIR | DDMYIGKGYK |
| Acacc-UTC/1-399 | NLLGLEVQDL | DEGKSQIAHG | ETVRETANMI | SFMADVIGIR | DDMYIGKGNA |
| Aparv-UTC/1-400 | NLLGLQLMDL | DEGKSQIAHG | ETVRETATMI | SFMADVIGIR | DDKFIGKGDA |
| Arima-UTC/1-400 | NLLGLQLMDL | DEGKSQIAHG | ETVRETATMI | SFMADVIGIR | DDKFIGKGDA |
| Bcapi-UTC/1-399 | NLLGLEVQDL | DEGKSQIAHG | ETVRETANMI | SFMADVIGIR | DDMYIGKGNA |
| Bhyod-UTC/1-379 | NLLGLEVQDL | DEGKSQIAHG | ETVRETANMV | SFMADVIGIR | DDMYIGKGHE |
| Bmurd-UTC/1-397 | NLLGLEVQDL | DEGKSQIAHG | ETVRETANMV | SFMADVIGIR | DDMYIGKGHE |
| Bpilo-UTC/1-380 | NLLGLEVQDL | DEGKSQIAHG | ETVRETANMV | SFMADVIGIR | DDMYIGKGHE |
| Crode-UTC/1-395 | NLLGLAQDDL | DEGKSQIAHG | ETVRETANMI | AFCADAIGIR | DDMYLGAGNA |
| Cbeij-UTC/1-397 | NLLGLEVQDL | DEGKSQVAHG | ETVRETANMI | SFMADVIGIR | DDMYIGKGNK |
| Cbolt-UTC/1-398 | NLLGLEVQDL | DEGKSQVAHG | ETVRETANMI | SFMADVIGIR | DDMYIGKGNA |
| Cbotu-UTC/1-398 | NLLGLEVQDL | DEGKSQIAHG | ETVRETANMI | SFMADVIGIR | DDMFIGKGNK |
| Ccarb-UTC/1-398 | NLLGLKVQDL | DEGKSQIAHG | ETVRETANMI | SFMADVIGIR | DDMFIRGNK  |
| Chath-UTC/1-397 | NLLGLEVQDL | DEGKSQVAHG | ETVRETANMI | SFMADVIGIR | DDMYIGKGNA |
| Chyle-UTC/1-398 | NLLGLEVQDL | DEGKSQIAHG | ETVRETANMI | SFMADVIGIR | DDMYIGKGNA |
| Cljun-UTC/1-398 | NLLGLEVQDL | DEGKSQIAHG | ETVRETANMI | SFMADVIGIR | DDMFIGKGNK |
| Csacc-UTC/1-397 | NLLGLEVQDL | DEGKSQVAHG | ETVRETANMV | SFMADVIGIR | DDMYIGKGNA |
| Cscin-UTC/1-397 | NLLGLKVQDL | DEGKSQIAHG | ETVRETANMI | SFMADVIGIR | DDMYIGKGNA |
| Csp72-UTC/1-397 | NLLGLEVQDL | DEGKSQVAHG | ETVRETANMV | SFMADVIGIR | DDMYIGKGNT |
| Cspor-UTC/1-398 | NLLGLEVQDL | DEGKSQIAHG | ETVRETANMI | SFMADVIGIR | DDMFIGKGNK |
| Cbact-UTC/1-397 | NLLGLEVQDL | DEGKSQVAHG | ETVRETANMI | SFMADVIGIR | DDMYIGKGNA |
| Caero-UTC/1-400 | NLLGLELQDL | DEKKSQIAHG | ETVRETATMI | SFMADVIGIR | DDMYIGKGDG |
| Eicta-UTC/1-395 | NLLGLAQDDL | DEGKSQIAHG | ETVRETANMI | SFCADAIGIR | DDMFLGAGNA |
| Etard-UTC/1-395 | NLLGLAQDDL | DEGKSQIAHG | ETVRETANMI | SFCADAIGIR | DDMFLGAGNA |
| Ecloa-UTC/1-395 | NLLGLAQDDL | DEGKSQIAHG | ETVRETANMI | SFCADAIGIR | DDMYLGAGNA |
| Efaec-UTC/1-397 | NLLGLEVQDL | DEGKSQISHG | ETVRETANMI | SFMADIIGIR | DDMYIGKGNA |
| Ecoli-UTC/1-396 | NLLGLAQDDL | DEGKSQIAHG | ETVRETANMI | SFCADAIGIR | DDMYLGAGNA |
| Elimo-UTC/1-399 | NLLGLEVQDL | DEGKSQVAHG | ETVRETANMI | SFMADVIGIR | DDMYIGKGNA |
| Ehall-UTC/1-399 | NLLGLEVQDL | DETKSQIAHG | ETVRETANMI | SFMADVIGIR | DDMYIGKGNK |
| Eyuri-UTC/1-397 | NLLGLEVQDL | DEGKSQIAHG | ETVRETANMI | SFMADVIGIR | DDMYIGKGNK |
| Lgood-UTC/1-397 | NLLGLEVQDL | DEGKSQIAHG | ETVRETANMI | SFMADVIGIR | DDMYIGKGNK |
| Osinu-UTC/1-415 | NLLGLEVQDL | DEGKSQVAHG | ETVRETANMI | SFMADVIGIR | DDMYIGKGNA |
| Ospor-UTC/1-401 | NLLGLEVSDL | DEKKSQVAHG | ETVRETANMI | SFMADIIGIR | DDMYIGKGNK |
| Pprof-UTC/1-395 | NMLGLAQDDL | DEGKSQIAHG | ETVRETANMI | SFCADAIGIR | DDMYLGAGNA |
| Rganv-UTC/1-397 | NLLGLEVQDL | DEGKSQIAHG | ETVRETANMI | SFMADVIGIR | DDMYIGKGNA |
| Rsp51-UTC/1-397 | NLLGLEVQDL | DEKKSQIAHG | ETVRETANMV | SFMADVIGIR | DDMYIGKGHA |
| Robeu-UTC/1-397 | NLLGLEVQDL | DEKKSQIAHG | ETVRETANMV | SFMADVIGIR | DDMYIGKGHA |
| Sterm-UTC/1-401 | NLLGLEVQDL | DEGKSQIAHG | ETVRETANMI | SFMADIIGIR | DDMYIGKGHT |
| Sbent-UTC/1-396 | NMLGLAQDDL | DEGKSQISHG | ETVRETANMI | SFCADAIGIR | DDMYLGAGNA |
| Shali-UTC/1-395 | NMLGLAQDDL | DEGKSQIAHG | ETVRETANMI | SFCADAIGIR | DDMYLGAGNA |
| Ssonn-UTC/1-372 | NLLGLAQDDL | DEGKSQIAHG | ETVRETANMI | SFCADAIGIR | DDMYLGAGNA |
| Ssma1-UTC/1-398 | NLLGLEVQDL | DEGKSQIAHG | ETVRETANMI | SFMADVIGIR | DDMYIGKGHT |
| Ssma2-UTC/1-398 | NMLGLEVQDL | DEGKSQVAHG | ETVRETANMI | SFMADVIGIR | DDMYIGKGHT |
| Tvinc-UTC/1-400 | NLLGLEVQDL | DEGKSQIAHG | ETVRETANMV | SFMADVIGIR | DDMYIGKGNT |
| Tvagi-UTC/1-398 | SMLGLSLSDL | DEGKSQISHG | ETVRETATMI | SFFTEAIGIR | DDLVLGAGHK |
| Vdisp-UTC/1-397 | NLLGLEVQDL | DEGKSQIAHG | ETVRETANMI | SFMADVIGIR | DDMYIGKGNA |
| Vparv-UTC/1-397 | NLLGLEVQDL | DEGKSQIAHG | ETVRETANMI | SFMADVIGIR | DDMYIGKGNA |
| Vshil-UTC/1-395 | NMLGLAQDDL | DEGKSQIAHG | ETVRETANMI | SFCADAIGIR | DDMYLGAGNA |
| Vspor-UTC/1-397 | NLLGLEVQDL | DEGKSQIAHG | ETVRETANMI | SFMADVIGIR | DDMYIGKGNA |

|                 |             |            |            |            |            |
|-----------------|-------------|------------|------------|------------|------------|
| Ahydr-UTC/1-395 | YMREVGAAALD | EGFEKGVLPQ | RPALVNLQCD | IDHPTQSMAD | LAWLQEHFGS |
| Acoli-UTC/1-398 | YMHEVSQSVR  | EGYRDGVLEQ | IPTLVNLQCD | IDHPTQCMAD | TLHLIHEFGG |
| Aprev-UTC/1-398 | YMKDFSEYVK  | EGHEDGVLEQ | RPTLVNLQCD | IDHPTQAMAD | LNHVIHEFGG |
| Atetr-UTC/1-398 | YMKDFSEYVQ  | EGYDDGVLEQ | RPTLVNLQCD | IDHPTQSMAD | LNHVIHEFGG |
| Avagi-UTC/1-404 | YMKDFAEYVQ  | EGYDHGVLEQ | RPHLVNLQCD | IDHPTQAMAD | LLHVIHEFGG |
| Acacc-UTC/1-399 | YMHEVADSVE  | QGNKDGILEQ | RPTLVNLQCD | IDHPTQCMAD | MLHIHEFGG  |
| Aparv-UTC/1-400 | YMREVSASVK  | QAFEDGVLDH | RPTLVSLQSD | MDHPTQSTAD | ILYLINEFGG |
| Arima-UTC/1-400 | YMREVSASVK  | QAFEDGVLDH | RPTLVSLQSD | MDHPTQSTAD | ILYLINEFGG |

Bcapi-UTC/1-399 YMHEVVDSVT QGHKDGIVLEQ KPTLVNLQCD IDHPTQCMAD MLHIIHEFGG  
Bhyod-UTC/1-379 YMKEVSESVK QGYNDGILEQ RPTLVNLQCD RDHPTQMMAD SLHFIHELGG  
Bmurd-UTC/1-397 YMKEVSDSVR QGYNDGILEQ IPTLVNLQCD RDHPTQMMAD SLHFIHELGG  
Bpilo-UTC/1-380 YMKEVSESVR QGYNDGILEQ IPTLVNLQCD RDHPTQMMAD SLHFIHELGG  
Crode-UTC/1-395 YMREVGEALD DGYKEGVLPQ RPALINLQCD IDHPTQAMAD LAWLREHFGS  
Cbeij-UTC/1-397 YMHTVADAVK EGYEDGVLEQ KPTLVNLQCD IDHPTQVMAD MLHIIHEFGG  
Cbolt-UTC/1-398 YMHEVVDVAVT QGHKDGIVLEQ KPTLVNLQCD IDHPTQCMAD MLHIIHEFGG  
Cbotu-UTC/1-398 YMHEVSDAVQ EGYKSGVLEQ RPTLVNLQCD IDHPTQCMAD LLHLIHYFGG  
Ccarb-UTC/1-398 YMHKVSSESVQ EGYKAGILGQ RPTLVNLQCD IDHPTQCMAD LLQLIHYFGG  
Chath-UTC/1-397 YMHEVVDSVT QGHKDGIVLEQ KPTLVNLQCD IDHPTQCMAD MLHIIHEFGG  
Chyle-UTC/1-398 YMHDVADAVT EGNKAGILAQ KPTLVNLQCD IDHPTQVMAD MLHIIHEFGG  
Cljun-UTC/1-398 YMHKVSSESVQ EGYKAGILGQ RPTLVNLQCD IDHPTQCMAD LLHLIHYFGG  
Csacc-UTC/1-397 YMHEFMEAVT QGNKDGIVLEQ RPTLVNLQCD IDHPTQSMAD ALHIIHEMGG  
Cscin-UTC/1-397 YMHEVVDSVT QGHKDGIVLEQ KPTLVNLQCD IDHPTQVMAD MLHIIHEFGG  
Csp72-UTC/1-397 YMREVSKAVR EGYEEGTLEQ IPTLVDLQCD IDHPTQAMAD ALHLINEFGG  
Cspor-UTC/1-398 YMHEVSDAVQ EGYKSAVLEQ RPTLVNLQCD IDHPTQCMAD LLHLIHYFGG  
Cbact-UTC/1-397 YMHEVVDVAVT QGHKDGIVLEQ KPTLVNLQCD IDHPTQCMAD MLHIIHEFGG  
Caero-UTC/1-400 YMAEVSESVQ QAYEDGVLDH RPTLISLQSD SDHPTQSSAD MLYLISEFGG  
Eicta-UTC/1-395 YMREVGAALD EGYEQGVLPQ RPALVNLQCD IDHPTQSMAD LAWLREHFGS  
Etard-UTC/1-395 YMREVGAALD EGYEQGVLPQ RPALVNLQCD IDHPTQSMAD LAWLREHFGS  
Ecloa-UTC/1-395 YMREVGAALD DGHKQGVLPQ RPALINLQCD IDHPTQSMAD LAWLREHFGS  
Efaec-UTC/1-397 YMHEVSESVQ EGYKDGIVLEQ RPTLVNLQCD IDHPTQAMAD ALHLIHEFGG  
Ecoli-UTC/1-396 YMREVGAALD DGYKQGVLPQ RPALVNLQCD IDHPTQSMAD LAWLREHFGS  
Elimo-UTC/1-399 YMHEVVDVAVT EGHKDGIVLEQ KPTLVNLQCD IDHPTQAMAD ALHLIHYFGG  
Ehall-UTC/1-399 YMHEVVDSVT QGNKDGIVLEQ KPTLVNLQCD IDHPTQCMAD MLHIIHEFGG  
Eyuri-UTC/1-397 YMRDYADYVE EGYKDGIVLEQ RPTLVDLQCD IDHPTQAMAD ALHVIHEFGG  
Lgood-UTC/1-397 YMHDVAVNAV T EGNKDGIVLEQ KPTLVNLQCD IDHPTQSMAD ALHLIHEFGG  
Osinu-UTC/1-415 YMHEVADSVE AGHKDGIVLEQ RPTLVNLQCD IDHPTQCMAD ALHVIHEMGG  
Ospor-UTC/1-401 YMHEVADSVA QGYKDGIVLEQ RPTLVNLQCD IDHPTQCMAD ALHVIHEMGG  
Pprof-UTC/1-395 YMREVGAALD EGVKEGVLPQ RPALINLQCD IDHPTQSMAD LAWLEEHFGD  
Rganv-UTC/1-397 YMHEVVDVAVT EGHKDGIVLEQ KPTLVNLQCD IDHPTQAMAD MLHIIHEFGG  
Rsp51-UTC/1-397 YQKEFMEAVT EGNKDGIVLEQ RPTLVNLQCD VDHPTQCMAD MLHIIHEFGG  
Robeu-UTC/1-397 YQKEFMDAVT EGNKDGIVLEQ RPTLVNLQCD VDHPTQCMAD MLHIIHEFGG  
Sterm-UTC/1-401 YMQEVSQAVQ EGHKDGIVLEQ RPTLVNLQCD IDHPTQSMAD MLHIIHEFGG  
Sbent-UTC/1-396 YMREVGAALD DGVEKGVLPQ RPALINLQCD IDHPTQSMSD LAWLEEHFGD  
Shali-UTC/1-395 YMREVGEALD DGVKEGVLPQ RPALINLQCD IDHPTQSMAD LAWLEEHFGD  
Ssonn-UTC/1-372 YMREVGAALD DGYKQGVLPQ RPALVNLQCD IDHPTQSMAD LAWLREHFGS  
Ssmal-UTC/1-398 YMKTVAQAVE DGHYDGVLEQ RPTLVNLQCD IDHPTQSMAD ALHVINEFGG  
Ssma2-UTC/1-398 YMKEVAASVQ AGYDAGILEQ RPTLVNLQCD IDHPTQSMAD ALHLINHFGG  
Tvinc-UTC/1-400 YMHTFMDDAVA EGNKDGIVLEQ RPTLVNLQCD IDHPTQIMAD TLHIIHEFGG  
Tvagi-UTC/1-398 YMLEVGESIT ESAEKKVLFK RPCIINLQCD EDHPTQAMAD LSHLVKVFSG  
Vdisp-UTC/1-397 YMREVSNAVK EGHEDGVLEQ RPTLVNLQCD IDHPTQIMAD AAHIIKEFGG  
Vparv-UTC/1-397 YMHQVSDAVK EGHEDGVLEQ RPTLVNLQCD IDHPTQIMAD TAHIIKEFGG  
Vshil-UTC/1-395 YMREVGEALD DGVKEGVLPQ RPALVNLQCD IDHPTQSMAD LAWLEEHFGG  
Vspor-UTC/1-397 YMHEVSDAVK EGHEDGVLEQ RPTLVNLQCD IDHPTQIMAD AAHIIKEFGG

Ahydr-UTC/1-395 LENLKGKKIA MTWAYSPSYG KPLSVPQGI I GLMTRFGMDV TLAHPEGYDL  
Acoli-UTC/1-398 LENLKGKKVA MTWAYSPSYG KPLSVPQGI I GLMTRFGMDV VLAHPEGYEV  
Aprev-UTC/1-398 IENLKGKKVA MTWAYSPSYG KPLSVPQGI S GLFTRLGMDV VLAHPEGYEI  
Atetr-UTC/1-398 IENLKGKKVA MTWAYSPSYG KPLSVPQGI S GLFTRLGMDV VLAHPEGYEI  
Avagi-UTC/1-404 IENLKGKKVA MTWAYSPSYG KPLSVPQGI S GLFTRFGMDV VLAHPEGYEI  
Acacc-UTC/1-399 VENLKGKKLA MSWAYSPSYG KPLSVPQGI I GLMTRMGMDV VLAHPEGYDV  
Aparv-UTC/1-400 LENLRGKKVA VTWAYSPSYG KPLSCPQSLI TLLPRFGMDV TLAHPEGYDL  
Arima-UTC/1-400 LENLRGKKVA VTWAYSPSYG KPLSCPQSLI TLLPRFGMDV TLAHPEGYDL  
Bcapi-UTC/1-399 VENLKGKKVA MTWAYSPSYG KPLSVPQGI I GLMTRFGMDV VLAHPEGYEV  
Bhyod-UTC/1-379 LENLKGKKVA MTWAYSPSYG KPLSVPQGA A GLFTRLGMDV ALAYPKGYEL  
Bmurd-UTC/1-397 LENLKGKKVA MTWAYSPSYG KPLSVPQGA A GLFTRLGMDV ALAYPKGYEL  
Bpilo-UTC/1-380 LENLRGKKVA MTWAYSPSYG KPLSVPQGA A GLFTRLGMDV ALAYPKGYEL



|                 |            |            |             |            |            |
|-----------------|------------|------------|-------------|------------|------------|
| Crode-UTC/1-395 | LENLKGKKIA | MTWAYSPSYG | KPLSVPQGI I | GLMTRFGMDV | TLAHPEGYDL |
| Cbeij-UTC/1-397 | IENLKGKKIA | MSWAYSPSYG | KPLSVPQGV I | GLMTRFGMDV | CLAHPEGYEV |
| Cbolt-UTC/1-398 | VENLKGKKLA | MTWAYSPSYG | KPLSVPQGV V | GLMTRMGMEV | VLAHPEGYEI |
| Cbotu-UTC/1-398 | VENLKGKKVA | MSWAYSPSYG | KPLSVPQGV V | GLMTRMGMEV | VLAHPEGYDL |
| Ccarb-UTC/1-398 | AEKLGKKMA  | MTWAYSPSYG | KPLSVPQGI I | GLMTRMGMEV | VLAHPDGYDI |
| Chath-UTC/1-397 | LENLKGKKLA | MTWAYSPSYG | KPLSVPQGV I | GLMTRMGMEV | VLAHPEGYEV |
| Chyle-UTC/1-398 | VENLKGKKLA | MTWAYSPSYG | KPLSVPQGV I | GLMTRFGMDV | VLAHPEGYEV |
| Cljun-UTC/1-398 | AQNLKGKKLA | MTWAYSPSYG | KPLSVPQGI I | GLMTRMGMEV | TLAHPEGYDI |
| Csacc-UTC/1-397 | LENLKGKKLA | MTWAYSPSYG | KPLSVPQGI I | GLMTRMGMEV | VLAHPEGYEV |
| Cscin-UTC/1-397 | VENLKGKKLA | MTWAYSPSYG | KPLSVPQGV I | GLMTRFGMDV | VLAHPEGYEV |
| Csp72-UTC/1-397 | IENLKGKKVA | MTWAYSPSYG | KPLSVPQGI I | GLLTRFGMDV | VLAHPEGYEV |
| Cspor-UTC/1-398 | IENLKGKKIA | MSWAYSPSYG | KPLSVPQGV V | GLMTRMGMEV | VLAHPEGYDL |
| Cbact-UTC/1-397 | VENLKGKKLA | MTWAYSPSYG | KPLSVPQGV V | GLMTRMGMEV | VLAHPEGYEI |
| Caero-UTC/1-400 | LENLKGKKVA | VTWAYSPSYG | KPLSCPQSL I | SLLPRFGMDV | TLAHPEGYDL |
| Eicta-UTC/1-395 | LENLKGKKIA | MTWAYSPSYG | KPLSVPQGI I | GLMTRFGMDV | TLAHPEGYDL |
| Etard-UTC/1-395 | LENLKGKKIA | MTWAYSPSYG | KPLSVPQGI I | GLMTRFGMDV | TLAHPEGYDL |
| Ecloa-UTC/1-395 | LENLKGKKIA | MTWAYSPSYG | KPLSVPQGI I | GLMTRFGMDV | TLAHPEGYDL |
| Efaec-UTC/1-397 | IENLKGKKVA | MTWAYSPSYG | KPLSVPQGI V | GLMTRLGMDV | VLAHPEGYEI |
| Ecoli-UTC/1-396 | LENLKGKKIA | MTWAYSPSYG | KPLSVPQGI I | GLMTRFGMDV | TLAHPEGYDL |
| Elimo-UTC/1-399 | IENLKGKKVA | MTWAYSPSYG | KPLSVPQGI V | GLMTRLGMDV | TLAHPEGYEI |
| Ehall-UTC/1-399 | VENLKGKKVA | MTWAYSPSYG | KPLSVPQGV V | GLMTRFGMDV | VLAHPEGYDI |
| Eyuri-UTC/1-397 | IENLKGKKIA | MTWAYSPSYG | KPLSVPQGI A | GLFTRLGMEV | SLAHPEGYEI |
| Lgood-UTC/1-397 | VENLKGKKIA | MSWAYSPSYG | KPLSVPQGI V | GLMTRFGMEV | VLAHPKGYEI |
| Osinu-UTC/1-415 | IENLKGKKLA | MTWAYSPSYG | KPLSVPQGV I | GLFTRLGMEV | VLAHPEGYDV |
| Ospor-UTC/1-401 | IENLKGKKLA | MSWAYSPSYG | KPLSVPQGV I | GLFTRLGMEV | VLAHPEGYDV |
| Pprof-UTC/1-395 | LNQLKGKKLA | MTWAYSPSYG | KPLSVPQGI I | GLMTRFGMDV | TLAHPEGYDL |
| Rganv-UTC/1-397 | VENLKGKKIA | MSWAYSPSYG | KPLSVPQGV I | GLMTRFGMDV | VLAHPEGYEV |
| Rsp51-UTC/1-397 | VENLKGKKIA | MTWAYSPSYG | KPLSVPQGV I | GLMTRFGMDV | VLAHPEGYDV |
| Robeu-UTC/1-397 | VENLKGKKIA | MSWAYSPSYG | KPLSVPQGV I | GLMTRFGMDV | VLAHPEGYDV |
| Sterm-UTC/1-401 | VENLKGKKIA | MTWAYSPSYG | KPLSVPQGI I | GLMSRFGMEV | VLAHPEGYEV |
| Sbent-UTC/1-396 | LKELKGKKIA | MTWAYSPSYG | KPLSVPQGI I | GLMTRFGMDV | TLAHPEGYDL |
| Shali-UTC/1-395 | LKELKGKKIA | MTWAYSPSYG | KPLSVPQGI I | GLMTRFGMDV | TLAHPEGYDL |
| Ssonn-UTC/1-372 | LENLKGKKIA | MTWAYSPSYG | KPLSVPQGI I | GLMTRFGMDV | TLAHPEGYDL |
| Ssma1-UTC/1-398 | VENLKGKKLA | MTWAYSPSYG | KPLSVPQGI I | GLFTRFGMDV | VLAHPEGYNV |
| Ssma2-UTC/1-398 | IENLKGKKIA | MTWAYSPSYG | KPLSVPQGI M | GLMSRFGMAV | TLAHPEGYEV |
| Tvinc-UTC/1-400 | LENLKGKKIA | MTWAYSPSYG | KPLSVPQGI A | GLFSRLGMNV | VLAHPEGYEI |
| Tvagi-UTC/1-398 | LEALRGKKIV | MSWAYSPSYG | KPLSVPQGI F | ALLSRFGTNL | VLAHPEGYDL |
| Vdisp-UTC/1-397 | IENLKGKKLA | MTWAYSPSYG | KPLSVPQGI A | GLFTRLGMEV | VLAHPEGYEV |
| Vparv-UTC/1-397 | VENLKGKKIA | MTWAYSPSYG | KPLSVPQGI A | GLFTRLGMEV | VLAHPEGYEV |
| Vshil-UTC/1-395 | LDQLKGKKIA | MTWAYSPSYG | KPLSVPQGI I | GLMSRFGMDV | VLAHPEGYDL |
| Vspor-UTC/1-397 | VENLKGKKLA | MTWAYSPSYG | KPLSVPQGI A | GLFTRLGMEV | VLAHPEGYEV |

|                 |            |            |            |            |            |
|-----------------|------------|------------|------------|------------|------------|
| Ahydr-UTC/1-395 | IPDVIEVAKE | NAKASGGSFR | QVTSMEEAFK | DADIVYPKSW | APYQVMEQRT |
| Acoli-UTC/1-398 | MPEVEEVAKK | NAAASGGSFR | RTNSMADAFK | DADIVYPKSW | APFAAMEKRT |
| Aprev-UTC/1-398 | MPEVEEIAKK | NAEYGGSF   | VTNSMEDAFK | DADIVYPKSW | APFAAMEERT |
| Atetr-UTC/1-398 | MPEVEEIAKK | NAEYGGSF   | VTNSMEDAFK | DADIVYPKSW | APFAAMEERT |
| Avagi-UTC/1-404 | MPEVEEIAEE | NAKYGGSFT  | KTNSMEEAFK | DADIVYPKSW | APFAAMEERT |
| Acacc-UTC/1-399 | MPEVEEVARK | NAEKSGGTF  | KTNSMEEAFK | DADIVYPKSW | APFAAMEERT |
| Aparv-UTC/1-400 | MPELVDVAGK | FAAESGATFK | KTYNMAEAFE | GADIVIPKSW | APYAAMEKRT |
| Arima-UTC/1-400 | MPELVDVAGK | FATESGATFK | KTHNMAEAFE | GADIVIPKSW | APYAAMEKRT |
| Bcapi-UTC/1-399 | MPEVEAVAKA | NAEKSGGTF  | KTNSMAEAFK | DADIVYPKSW | APFAAMEERT |
| Bhyod-UTC/1-379 | MPEVEAIAKK | NAEAAGVKLT | ITNNMDEAFE | DADVVPKSW  | APFAAMQERT |
| Bmurd-UTC/1-397 | MPEVEAIAKK | NAEAAGVKLT | ITNSMDEAFE | NADVVPKSW  | APFAAMQERT |
| Bpilo-UTC/1-380 | MPEVEAIAKK | NAEAAGVKLT | ITNDMDEAFE | NADVVPKSW  | APFAAMQERT |
| Crode-UTC/1-395 | IPDVIEVAKN | NANNSGGSFR | QVTSMEEAFK | DADIVYPKSW | APYKVMERRT |
| Cbeij-UTC/1-397 | MEEVENIARN | NAKESGGTF  | KTNNMAEAFK | DADIVYPKSW | APFAAMKERT |
| Cbolt-UTC/1-398 | MPEVEEVARK | NAEKTGGSFR | VSHDMADAFK | DADIVYPKSW | APFAAMEKRT |
| Cbotu-UTC/1-398 | MPEVEDVARK | NAKASGGKFT | KTNSMKEAFE | NADVVPKSW  | APFAFMERRT |

|                 |            |             |            |            |            |
|-----------------|------------|-------------|------------|------------|------------|
| Ccarb-UTC/1-398 | LPEVEEVARN | NAEKSGGKFT  | KTNSMKEAFE | NADIVYPKSW | APFAAMEKRT |
| Chath-UTC/1-397 | MPEVEEVARK | NAEKSGGSFR  | VSHDMADAFK | DADIVYPKSW | APFAAMEKRT |
| Chyle-UTC/1-398 | FPEVEAVAAE | NASKSGGSYT  | KTNDMKEAFQ | DADIVYPKSW | APFAAMEKRT |
| Cljun-UTC/1-398 | LPEVENVARR | NAEISGGKFI  | KTNSMKEAFE | NADIVYPKSW | APFAAMEKRT |
| Csacc-UTC/1-397 | MPEVVEVAKK | NAEKSGGSFR  | ISNDMADAFK | DADVVPKSW  | APFAAMEKRT |
| Cscin-UTC/1-397 | FPEVEAVAAE | NAKKSOGGSYT | KTNSMAEAFK | DADIVYPKSW | APFAAMGQRT |
| Csp72-UTC/1-397 | MPEVEEIAKE | NAKLSGGSFY  | KTNSMEEAFK | EADIVYPKSW | APFVAMEKRT |
| Cspor-UTC/1-398 | MPEVEEVARK | NAKVSOGKFT  | KTNSMKEAFE | NADIVYPKSW | APFAFMERRT |
| Cbact-UTC/1-397 | MPEVEEVAKK | NAAATGGSFY  | VSHDMADAFK | DADIVYPKSW | APFAAMEKRT |
| Caero-UTC/1-400 | MPEVVERAKG | YAAESGTTFK  | QVNTMAEAFE | GADIVIPKSW | APFAAMEKRT |
| Eicta-UTC/1-395 | IPDVVEVAHN | NAKASGGSFY  | QVSSMEEAFK | GADIVYPKSW | APYKVMQRT  |
| Etard-UTC/1-395 | IPDVVEVAHN | NAKASGGSFY  | QVSSMEEAFK | DADIVYPKSW | APYKVMQRT  |
| Ecloa-UTC/1-395 | IPDVIEVAKN | NAKASGGSFY  | QVTDMAEAFK | DADIVYPKSW | APYKVMQRT  |
| Efaec-UTC/1-397 | MPEVEEVAKK | NAAEFGGNFT  | KTNSMAEAFK | DADVVPKSW  | APFAAMEKRT |
| Ecoli-UTC/1-396 | IPDVVEVAKN | NAKASGGSFY  | QVTSMEEAFK | DADIVYPKSW | APYKVMERT  |
| Elimo-UTC/1-399 | MSDVVEVAKK | NAAESGGSFY  | KTNSMAEAFK | DADVVPKSW  | APFSAMEERT |
| Ehall-UTC/1-399 | MPEVEEVAKK | NAAENGGSFT  | KTNSMAEAFK | DADIVYPKSW | APFAAMEKRT |
| Eyuri-UTC/1-397 | MPEVEEIAK  | NAEISGGKFI  | KTNSMAEAFK | DADIVYPKSW | APFAAMEKRT |
| Lgood-UTC/1-397 | MPEVQKVAEK | NAIESGGTFK  | VTNDMKEAFK | NADIVYPKSW | APFVAMEKRT |
| Osinu-UTC/1-415 | MGDVVDVAEK | NAKESGGSFY  | VTNDMKEAFQ | GADIVYPKSW | APFAAMEKRT |
| Ospor-UTC/1-401 | MKVVEVAKK  | NAQOQSGSFY  | LTHDMKDAFR | DADIVYPKSW | APFAAMEERT |
| Pprof-UTC/1-395 | IPEVVEQARQ | NAEASGGSFY  | QVTSMEEAFD | GADIVYPKSW | APYQVMERRT |
| Rganv-UTC/1-397 | FSEVEAVAAE | NAKKSOGGSFT | KTNNMAEAFK | DADIVYPKSW | APFAAMEKRT |
| Rsp51-UTC/1-397 | MPEVEEIAK  | NAEKNGGSFT  | KTNDMAEAFK | DADIVYPKSW | APFAAMEKRT |
| Robeu-UTC/1-397 | MPEVEEIAK  | NAEATGGSFY  | KTNSMEEAFK | DADIVYPKSW | APFAAMEKRT |
| Sterm-UTC/1-401 | MPEVEEVARK | NAEASGGSFV  | KTNNMAEAFK | DADIVYPKSW | APFAAMEKRT |
| Sbent-UTC/1-396 | IPEVVEQAKK | NAKESGGSFY  | QVDTMAAAFE | GADIVYPKSW | APYKVMERRT |
| Shali-UTC/1-395 | IPEVVEEAKK | NAVASGGSFY  | QVDTMAEAFE | GADIVYPKSW | APYQVMGKRT |
| Ssonn-UTC/1-372 | IPDVVEVAKN | NAKASGGSFY  | QVTSMEEAFK | DADIVYPKSW | APYKVMERT  |
| Ssma1-UTC/1-398 | MPEMEGVAEK | NAQKSGGSFV  | KVNSMAEAFK | DADIVYPKSW | APFSVMEERT |
| Ssma2-UTC/1-398 | MPEVEKIAEI | NSAKSGGTFV  | KTNSMAEAFK | DADIVYPKSW | APFKAMEKRT |
| Tvinc-UTC/1-400 | MPEVEEVAKK | QSKASGGSFY  | KTNSMKEAFK | DADIVYPKSW | APFTAMEKRT |
| Tvagi-UTC/1-398 | IPEIIEITKK | NAEKAGGSFE  | ISHNMREAFK | GADVVPKSW  | APMWISEKRT |
| Vdisp-UTC/1-397 | MPEVEEIAK  | QAEESGGSFY  | RTNDMKEAFK | DADIVYPKSW | APFGAMEKRT |
| Vparv-UTC/1-397 | MPEVEEIAK  | QAEASGGSFY  | RTNDMKDAFK | DADIVYPKSW | APFGAMEKRT |
| Vshil-UTC/1-395 | IPEVVEEAKK | NAQESGGSFY  | QVTSMEEAFK | DADIVYPKSW | APYKVMGERT |
| Vspor-UTC/1-397 | MPEVEEIAK  | QAEACGGSFY  | KTNDMKDAFK | DADIVYPKSW | APFGAMEKRT |

|                 |             |            |            |            |             |
|-----------------|-------------|------------|------------|------------|-------------|
| Ahydr-UTC/1-395 | ELLRANDHAG  | LKELEQHCLA | QNAKHKDWHC | TEEMMALTG  | G.EALYMHCL  |
| Acoli-UTC/1-398 | NLYGEGDAEG  | IKALEKELLA | QNAEHKDWCC | TEELMKMTKD | G.KALYHLHCL |
| Aprev-UTC/1-398 | KLYGEGDQKG  | IDELEQRLLE | QNKEHMDWEC | TEEMMELTKD | G.KALYMHCL  |
| Atetr-UTC/1-398 | KLYGEGDQKG  | IDELEKRLLE | QNKNHMDWEC | TEEMMKLTKD | G.KALYMHCL  |
| Avagi-UTC/1-404 | DLYAKGDQKG  | IDELEQRLLE | QNKEHMDWAC | TEEMMKLTKD | G.KALYMHCL  |
| Acacc-UTC/1-399 | ELYGNDFDFG  | IDRLEKELLA | QNAKHKDWAC | TEELMKTTKD | G.KALYHLHCL |
| Aparv-UTC/1-400 | NLYAAGDDAG  | IDALEKELLA | QNATHKDWCC | TTDLMAKTAH | GMDTIYMHPL  |
| Arima-UTC/1-400 | NLYAAGDDAG  | IDALEKDLA  | ENATHKDWCC | TADLMAKTAH | GMDTIYMHPL  |
| Bcapi-UTC/1-399 | DLYAKGDSDG  | IKALEKRLLA | QNAEHKDWCC | TEELMKTTKD | G.KALYHLHCL |
| Bhyod-UTC/1-379 | DLYGKGDTDG  | IKALEKRLLE | QNAQHKDWCC | TEEKMKKTKN | G.KALYHLHCL |
| Bmurd-UTC/1-397 | DLYGKGDTDG  | IKALEKRLLE | QNAQHKDWCC | TEEKMKKTKD | G.KALYHLHCL |
| Bpilo-UTC/1-380 | DLYGKGDTDG  | IKALEKRLLE | QNAKHKDWCC | TEEKMKKTKD | G.KALYHLHCL |
| Crode-UTC/1-395 | ELLRANDHDG  | LAALEKECLA | QNAKHKDWHC | TEEMMKHTRD | G.EALYMHCL  |
| Cbeij-UTC/1-397 | DLYSEGDSSEG | IKELEKLLA  | QNAEHKDWEC | TEELMKTTKD | G.KALYHLHCL |
| Cbolt-UTC/1-398 | NLYAEGDSEG  | IKTLEKELLA | QNAEHKDWCC | TEELMKTTKD | G.KALYHLHCL |
| Cbotu-UTC/1-398 | NLYGEGKFKE  | IDVLEKELLE | ENAKHKDWEC | TEEMMKLTKD | E.KALYHLHCL |
| Ccarb-UTC/1-398 | KLYGEGKFDE  | IKVLEKELLN | QNANYKDWEC | TEEMMKLTKD | S.KALYMHCL  |
| Chath-UTC/1-397 | NLYGEGDTEG  | IKALEKELLA | QNAEHKDWCC | TEELMKTTKD | G.KALYHLHCL |
| Chyle-UTC/1-398 | DLYAKGDQAG  | IDALEKELLS | QNAQHKDWAC | TEELMKTTKD | G.KALYHLHCL |
| Cljun-UTC/1-398 | NLYGEGKFDE  | IEVLEKELLN | QNANYKDWEC | TEEMMKLTKD | S.KALYMHCL  |

|                 |            |            |            |            |            |
|-----------------|------------|------------|------------|------------|------------|
| Csacc-UTC/1-397 | NLYAEGDSGD | IKALEKELLS | QNAQHKDWCC | TEELMKTTKD | G.KALYMHCL |
| Cscin-UTC/1-397 | ELYAQGDQAG | IDALEKELLA | QNAQHKDWAC | TEELMSTTKD | G.KALYLHCL |
| Csp72-UTC/1-397 | DLYGNGDFDG | IKELEKELLA | QNAEHKDWQC | TEELMKTTKD | G.KALYLHCL |
| Cspor-UTC/1-398 | NLYGEGKFKE | IDVLEKELLE | ENAKHKDWEC | TEEMMKLTKD | E.KALYLHCL |
| Cbact-UTC/1-397 | NLYAEGDSEG | IKALEKELLA | QNAEHKDWCC | TEELMKTTKD | G.KALYLHCL |
| Caero-UTC/1-400 | NLYAEGDDAG | IAALEKELLA | QNATHQDWCS | TTELMKKTAN | QDITFIMHPL |
| Eicta-UTC/1-395 | ELLRANDHDG | LKALEKQCLA | QNaNHKNWHC | TEEMMKLTRG | G.EALYMHCL |
| Etard-UTC/1-395 | ELLRANDHDG | LKALEKQCLA | QNaNHKDWHC | TEEMMKLTRG | G.EALYMHCL |
| Ecloa-UTC/1-395 | ELLRANDHDG | LKTLEKACLA | QNaNHKDWHC | TEEMMKLTRD | G.NALYMHCL |
| Efaec-UTC/1-397 | ELYGNGDQAG | IDOLEQELLS | QNKHKDWEC  | TEELMKTTKD | G.KALYMHCL |
| Ecoli-UTC/1-396 | ELLRANDHEG | LKALEKQCLA | QNAQHKDWHC | TEEMMELTRD | G.EALYMHCL |
| Elimo-UTC/1-399 | ILYGNGDQEG | IDRLEKELLA | QNaNHKDWEC | TEELMKTTKD | G.KALYMHCL |
| Ehall-UTC/1-399 | DLYAEGDQAG | IDALEKELLA | QNAEHKDWCC | TEELMSTTKD | G.KALYLHCL |
| Eyuri-UTC/1-397 | DLYGKGDQAG | IDALEKELLA | QNAKHKDWEC | TEELMKTTKN | G.KALYMHCL |
| Lgood-UTC/1-397 | VLYGNGDTQG | IKELEKELLE | ENSKHKDWEC | TEEFMKNTKN | G.KALYLHCL |
| Osinu-UTC/1-415 | NLYGEGDTEG | IKALEKELLA | QNAQHKDWAC | TEEMMKLTKD | G.KALYMHCL |
| Ospor-UTC/1-401 | ELYGRGDQKG | IDELEQRLLK | QNAAHKDWAC | TEEMMKLTKN | G.KALYLHCL |
| Pprof-UTC/1-395 | ELLRAQDHDG | LKALEQECLA | QNaNFKDWHC | TEEMMTKTKG | G.EALYMHCL |
| Rganv-UTC/1-397 | ELYGNGDFAG | IDALEKELLE | QNAQHKDWAC | TEELMKTTKD | G.NALYLHCL |
| Rsp51-UTC/1-397 | DLYAEGDFDG | IDKLEKELLA | QNAQHKDWAC | TEELMKTTKD | G.KALYLHCL |
| Robeu-UTC/1-397 | NLYAEGDFEG | IDKLEKELLA | QNAEHKDWAC | TEELMKTTKD | G.KALYLHCL |
| Sterm-UTC/1-401 | NLYGEGKFDE | INVLEKELLA | QNaNHKDWEC | TEELMKTTTE | G.KALYMHCL |
| Sbent-UTC/1-396 | VMLRANDQEG | LKSLEQECLA | QNAKHKDWHC | TEEMMTKTKD | G.EALYMHCL |
| Shali-UTC/1-395 | ELLRANDEAG | LKSLEQECLA | QNAKHKDWHC | TEEMMKTKK  | G.EALYMHCL |
| Ssonn-UTC/1-372 | ELLRANDHEG | LKALEKQCLA | QNAQHKDWHC | TEEMMELTRD | G.EALYMHCL |
| Ssma1-UTC/1-398 | KIVETGDQQA | LKELEKRCLA | QNAQFIDWEC | TEELMSTTRE | G.KALYLHCL |
| Ssma2-UTC/1-398 | GLYGKGDQAG | IDKLEKELLG | QNAHDKDWEC | TEELMNSTKE | G.KALYMHCL |
| Tvinc-UTC/1-400 | SLYGAGDFDG | IKALEKELLA | QNGHKKDWEC | TEDMMKLTKD | G.KALYLHCL |
| Tvagi-UTC/1-398 | QQLKKKDYDG | LKATEKECLE | LNKKYIDWQC | DDEMMAATKD | G.KALYMHCL |
| Vdisp-UTC/1-397 | KLYGENDHEG | IKALEKVLE  | ENGKHKDWAC | TEEMMSLTKD | G.KALYLHCL |
| Vparv-UTC/1-397 | KLYGENDHEG | IKALEKVLE  | ENGKHKDWAC | TEEMMSLTKD | G.KALYLHCL |
| Vshil-UTC/1-395 | DLLRANDHDG | LKELEKACLA | QNAQHKDWHC | TEEMMKLTKG | G.EALYMHCL |
| Vspor-UTC/1-397 | KLYGDNDHEG | IKALEKVLE  | ENGKHKDWAC | TEEMMSLTKD | G.KALYLHCL |

|                 |            |            |            |            |            |
|-----------------|------------|------------|------------|------------|------------|
| Ahydr-UTC/1-395 | PADISGVSC  | EGEVSEGVFE | KYRIATYKEA | SWKPYIIAAM | IVARKFSAPG |
| Acoli-UTC/1-398 | PADINDVSC  | DGEVEASVFD | RYRTPYKEA  | SYKPYVIAAM | MFLAKVKDPQ |
| Aprev-UTC/1-398 | PADITGVSAE | HGEVAESVFD | RYRVPLYKEA | SFKPYIIAAM | ILLQKIENPE |
| Atetr-UTC/1-398 | PADITGVSAE | HGEVADTVFD | RYRVPLYKEA | SFKPYIIAAM | ILLQKVENPE |
| Avagi-UTC/1-404 | PADITGLSCE | DGEVDESVD  | RYRDPLYKEA | SFKPYIIAAM | IFLQKVKDPK |
| Acacc-UTC/1-399 | PADITGLSCE | EGEVDESVD  | RYRNPLYKEA | SYKPYVIAAM | IFLSKFEDPQ |
| Aparv-UTC/1-400 | PADINGVSCE | HGEVENEVFD | YHRDGLYKEA | SYKPYAIAAM | IFLQKAKDPI |
| Arima-UTC/1-400 | PADINGVSCE | HGEVANEVFD | YHRDGLYKEA | SYKPYAIAAM | IFLQKAKDPI |
| Bcapi-UTC/1-399 | PADINGVSCV | DGEVEATVFD | RYRDPLYKEA | SYKPYIIAAM | IFLAKCKDPQ |
| Bhyod-UTC/1-379 | PADINDVSC  | DGEVAASVFD | RYRVPLYKQA | SYKPYVIAAM | IFLSKFRDPQ |
| Bmurd-UTC/1-397 | PADINDVSC  | DGEVAASVFD | RYRVPLYKQA | SYKPYVIAAM | IFLSKFRDPQ |
| Bpilo-UTC/1-380 | PADINDVSC  | DGEVAASVFD | RYRVPLYKQA | SYKPYVIAAM | IFLSKFRDPQ |
| Crode-UTC/1-395 | PADITDVSC  | EGEVTQGVFE | KYRIATYKEA | SWKPYIIAAM | ILCRKYAKPG |
| Cbeij-UTC/1-397 | PADISNLSCE | KGEVEDSVFD | RYRVPLYKEA | SYKPYIIAAM | ILLAKVKNPA |
| Cbolt-UTC/1-398 | PADINDVSC  | DGEVEATVFD | RYRDPLYKEA | SYKPYVIAAM | IMLAKFADPA |
| Cbotu-UTC/1-398 | PADITGVSC  | HGEVAESVFD | RYREPLYKEA | GYKPYIIAAM | MFLSKVKNPA |
| Ccarb-UTC/1-398 | PADITGVSC  | QGEVAASVFD | RYREELYKQA | GYKPYIIASM | IFLSKVKDPV |
| Chath-UTC/1-397 | PADINDVSCV | DGEVEASVFD | RYRDPLYKEA | SFKPYVIAAM | IFLAKFENPQ |
| Chyle-UTC/1-398 | PADITGVSC  | EGEVDASVFD | RYREPLYKEA | SFKPYIIAAM | IFLAKFADPA |
| Cljun-UTC/1-398 | PADITGVSC  | QGEVAASVFD | RYREELYKQA | GYKPYIVASM | IFLSKVKDPV |
| Csacc-UTC/1-397 | PADINDVSCV | DGEVEATVFD | RYRDPLYKEA | SYKPYVIASM | IFLSKFKNPQ |
| Cscin-UTC/1-397 | PADITGVSC  | TGEVDASVFD | RYRTLLYKEA | SYKPYIIAAM | IFLAKFADPA |
| Csp72-UTC/1-397 | PADITGVSC  | TGEVDASVFD | RYRKPLYKEA | SYKPYVIAAM | IFLSKVKDPQ |
| Cspor-UTC/1-398 | PADITGVSC  | EGEVAASVFD | RYREPLYKEA | GYKPYIIAAM | MFLSKVKNPA |

Cbact-UTC/1-397 PADINDVSCK DGEVEASVFD RYRDPLYKEA SYKPYVIAAM IMLAKFADPA  
 Caero-UTC/1-400 PADISGVSC EGEVNADVFD MHRVGMKEA SYKPYAIAAM MFLQKVADPA  
 Eicta-UTC/1-395 PADISGVSC EGEVTEGVFE KYRIATYKEA SWKPYIIAAM IVARFKPKPG  
 Etard-UTC/1-395 PADISGVSC EGEVTEGVFE KYRIATYKEA SWKPYIIAAM IVARFKPKPG  
 Ecloa-UTC/1-395 PADITGVSCA EGEVTEGVFE KYRIETYKEA SWKPYIIAAM ILARKYAKPG  
 Efaec-UTC/1-397 PADITGVSC EGEVEASVFD RYRVELYKEA SYKPYVIAAM IFLSKVKNPQ  
 Ecoli-UTC/1-396 PADISGVSC EGEVTEGVFE KYRIATYKEA SWKPYIIAAM ILSRKYAKPG  
 Elimo-UTC/1-399 PADITGVSC EGEVEASVFD RYRTELYKEA SYKPYIIAAM IFLAKEKDPQ  
 Ehall-UTC/1-399 PADINGVSCK DGEVEASVFD RYRDPLYKEA SYKPYIIAAM ILLAKQKIDIT  
 Eyuri-UTC/1-397 PADITGLSCK EGEVENSVD RYRVPLYKEA SFKPYVIAAM IFLAKVKDPQ  
 Lgood-UTC/1-397 PADISGVSC KGEVEASVFN RYRIPLYKQA SFKPYIIAAM IFLSKVKEPE  
 Osinu-UTC/1-415 PADITGVSC EGEVDATVFD RYRDPLYKEA SYKPYVIAAM ILLEKFKDPA  
 Ospor-UTC/1-401 PADISGVSC EGEVDASVFD RYRDPLYKEA SFKPYVIASM ILLEKFRDPA  
 Pprof-UTC/1-395 PADITGVSC EGEVEEAVFE KYRIATYKEA SWKPYIIASM IMNRKYQEPG  
 Rganv-UTC/1-397 PADITGVSC SGEVDASVFD RYRTPYKEA SYKPYIIAAM IFLAKFADPA  
 Rsp51-UTC/1-397 PADITGVSC TGEVDASVFD RYRIPLYKEA SFKPYIIAAM IMLSKFENPQ  
 Robeu-UTC/1-397 PADITGVSC TGEVDASVFD RYRIPLYKEA SFKPYIIAAM IMLSKFENPQ  
 Sterm-UTC/1-401 PADITGVSC EGEVEASVFD RYRVPLYKEA GYKPYIIAAM MFLSKVKDPV  
 Sbent-UTC/1-396 PADISGVSC EGEVEEAVFE KYRIATYKQA SWKPYIIASM ILNRKFSEPG  
 Shali-UTC/1-395 PADITGVSC EGEVEEAVFE KYRIATYKEA SWKPYIIASM ILNRKYANPG  
 Ssonn-UTC/1-372 PADISGVSC EGEVTEGVFE KYRIATYKEA SWKPYIIAAM ILSRKYAKPG  
 Ssmal-UTC/1-398 PADISGVSC KGEVAASVFD RYRDPLYKQA SFKPYIIAAM IFLAKFRNPS  
 Ssma2-UTC/1-398 PADITDVSCK KGEVAASVFD RYRDPLYKQA SFKPYIIAAM IFLSKVKNPA  
 Tvinc-UTC/1-400 PADITGVSC EGEVAGSVFD RYRIPLYKQA SFKPYIIAAM IFLAKVRYPO  
 Tvagi-UTC/1-398 PADISGLSCK RGEITNECFQ KNRLDITYFEA SHKPFIIASM IMHCKCKSVA  
 Vdisp-UTC/1-397 PADITGVSC EGEVDATVFD RYRVPLYKEA SYKPYVIAAM IFLSKFKNPV  
 Vparv-UTC/1-397 PADITGVSC EGEVDATVFD RYRIPLYKEA SYKPYVIAAM IFLSKFKNPV  
 Vshil-UTC/1-395 PADITGVSC EGEVEEAVFE KYRIATYKEA SWKPYIIAAM ILNRKYQDVA  
 Vspor-UTC/1-397 PADITGVSC EGEVDATVFD RYRVPLYKEA SYKPYVIAAM IFLSKFKNPV

Ahydr-UTC/1-395 AALEGLIKEA QKRVK~~~~~  
 Acoli-UTC/1-398 QVLKALEERK TARWIG~~~~~  
 Aprev-UTC/1-398 EKLRELVDKA NKR.IDK~~~~~  
 Atetr-UTC/1-398 EKLRELVDKA KKR.LDK~~~~~  
 Avagi-UTC/1-404 ATIEKLIEN KERLVDKEDE NK  
 Acacc-UTC/1-399 AILKKEENK KPRIFK~~~~~  
 Aparv-UTC/1-400 ATLKALEQGD TPRWFOA~~~~~  
 Arima-UTC/1-400 ATLKALEQGN TPRWFOA~~~~~  
 Bcapi-UTC/1-399 AVLKALEERG TKRQFSL~~~~~  
 Bhyod-UTC/1-379 AILSKLASDK KQRIFG~~~~~  
 Bmurd-UTC/1-397 AILSKLASDG KPRVFGC~~~~~  
 Bpilo-UTC/1-380 AILSKLASDG KPRVFGY~~~~~  
 Crode-UTC/1-395 QVLEQLLKDA QKRIK~~~~~  
 Cbeij-UTC/1-397 EVLEKMAQSE .DIRFKG~~~~~  
 Cbolt-UTC/1-398 EVLKKLEEK TPRVFK~~~~~  
 Cbotu-UTC/1-398 LKFEKLIKEN NPRFYGK~~~~~  
 Ccarb-UTC/1-398 KTFAEIIEAK PPRFLAK~~~~~  
 Chath-UTC/1-397 EILKKEERN TPRVFK~~~~~  
 Chyle-UTC/1-398 DILKKLDEKG TPRILK~~~~~  
 Cljun-UTC/1-398 KTLTEIIDSK PPRFLAK~~~~~  
 Csacc-UTC/1-397 EILKKEVKK APRIFE~~~~~  
 Cscin-UTC/1-397 VILKKEENG KPRVFK~~~~~  
 Csp72-UTC/1-397 EVLAKLEEAK KDRQVK~~~~~  
 Cspor-UTC/1-398 LKFEELKAN KPRFYGK~~~~~  
 Cbact-UTC/1-397 EILKKEEK TPRVFK~~~~~  
 Caero-UTC/1-400 ATLKALDERN TARWLQA~~~~~  
 Eicta-UTC/1-395 LVLDQLLKEA QKRIK~~~~~  
 Etard-UTC/1-395 LVLEQLLKEA QKRIK~~~~~

Ecloa-UTC/1-395 MVLEQLLREA QKRIK~~~~~  
Efaec-UTC/1-397 KTLTELADKA TPREVK~~~~~  
Ecoli-UTC/1-396 ALLEQLLKEA QERVK~~~~~  
Elimo-UTC/1-399 ATLKALEERG IDRFFTK~~~~~  
Ehall-UTC/1-399 GTLEALADKA TPRHFGE~~~~~  
Eyuri-UTC/1-397 EMLQRLNKA KQRWAK~~~~~  
Lgood-UTC/1-397 KTLLENLMION KIRWNF~~~~~  
Osinu-UTC/1-415 KVLEELQKRG QDRIFE~~~~~  
Ospor-UTC/1-401 KLLRELEKRG QRRQFE~~~~~  
Pprof-UTC/1-395 LVLQQLLDEY KTRVK~~~~~  
Rganv-UTC/1-397 DILKKLEEK TPRVFE~~~~~  
Rsp51-UTC/1-397 DILKKLEVKA APRILK~~~~~  
Robeu-UTC/1-397 DILKKLEVKA APRIMK~~~~~  
Sterm-UTC/1-401 ATLKALSEGK KPRFFEK~~~~~  
Sbent-UTC/1-396 KILEELLKDA KKRVK~~~~~  
Shali-UTC/1-395 TILQQLLDDD KKRVK~~~~~  
Ssonn-UTC/1-372 ALLEQLLKEA QERVK~~~~~  
Ssmal-UTC/1-398 EKLLDLLTDA RKRIY~~~~~  
Ssma2-UTC/1-398 DRLDTILNAN LPRIV~~~~~  
Tvinc-UTC/1-400 LTLEELEKRA TLRHTGR~~~~~  
Tvagi-UTC/1-398 GAIKGIIARN EKNQEF~~~~~  
Vdisp-UTC/1-397 ETLKELERKG TDRVQP~~~~~  
Vparv-UTC/1-397 ETLKELERKG TERVQP~~~~~  
Vshil-UTC/1-395 GVLDELLNES EKRVK~~~~~  
Vspor-UTC/1-397 ETLKELERKG TDRVQP~~~~~
